# Supplementary material for: Detection of nitro explosives via LSPR sensitive silver clusters embedded in porous silica
Source: Royal Society of Chemistry journal article supplement (doi:10.1039/c2jm31770b), 2012-01-01

Supporting Information for “Detection of nitro explosives via LSPR sensitive silver clusters embedded in porous silica”

Wei Zou,<sup>a</sup> Wenwen Liu,<sup>a</sup> Limei Luo,<sup>a</sup> Shufen Zhang,<sup>a</sup> Rongwen Lu\*<sup>a</sup> and Götz Vesper<sup>b</sup>

<sup>a</sup> State Key Laboratory of Fine Chemicals, Dalian University of Technology, Dalian, 116024 (P.R. China)

<sup>b</sup> Department of Chemical Engineering, University of Pittsburgh, Pittsburgh, PA 15261(USA)

Corresponding author. Tel. +86-411-84986270; Fax: +86-411-84986292; E-mail:

lurw@dlut.edu.cn

Figure S1. Nitrogen adsorption (□) and desorption (○) isotherms of silica-embedded silver clusters. The corresponding BET surface area and micropore volume are 159 m<sup>2</sup>/g and 0.41 cm<sup>3</sup>/g, respectively.

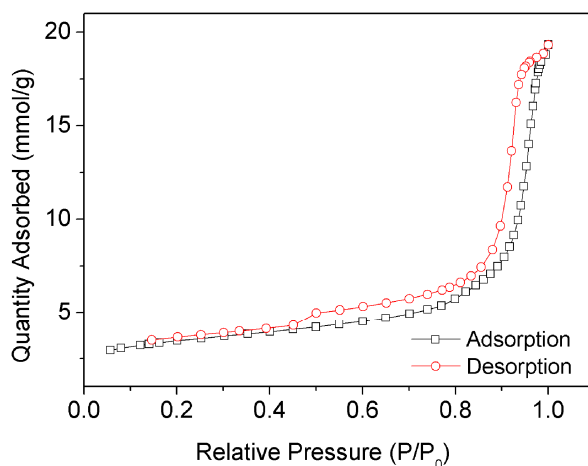

Figure S2. Pore size distribution curves of Ag clusters embedded in porous silica (inset shows the microporosity of the silica). A narrow distribution of pores centered around 4 nm is due to the tensile strength effect (TSE) phenomenon.<sup>[1]</sup>

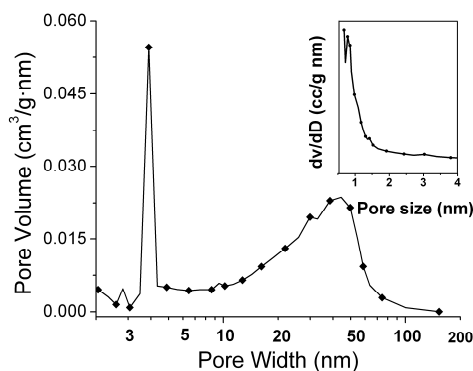

[1] Johan C. Groen, Louk A.A. Peffer, Javier Perez-Ramirez, *Microporous and Mesoporous Materials*, 2003, 60, 1

Table S1 Dielectric constant and dipole moment of organic compounds used<sup>[2]</sup>

| Entry | Substance                              | Dielectric constant, $\epsilon$ | Dipole moment, D |
|-------|----------------------------------------|---------------------------------|------------------|
| 1     | <i>p</i> -nitrotoluene ( <i>p</i> -NT) | 22.2                            | 4.47             |
| 2     | 2,4,6-trinitrotoluene (TNT)            | 22                              |                  |
| 3     | nitroglycerin (NG)                     | 19.2                            | 3.38             |
| 4     | phenol                                 | 12.4                            | 1.22             |
| 5     | benzoic acid                           | 8.93 <sup>[3]</sup>             |                  |

[2] James G. Speight, *Lange's Handbook of Chemistry* 16th Edition, McGraw-Hill, 2004

[3] Yurquina, A., *Journal of Molecular Liquids* 2003, 108(1-3), 119-133

Figure S3. Extinction band change observed for silica-embedded silver clusters before and after the addition of 1  $\mu$ M solutions of TNT. (i.e. that silica-embedded silver clusters are sensitive to the presence of TNT)

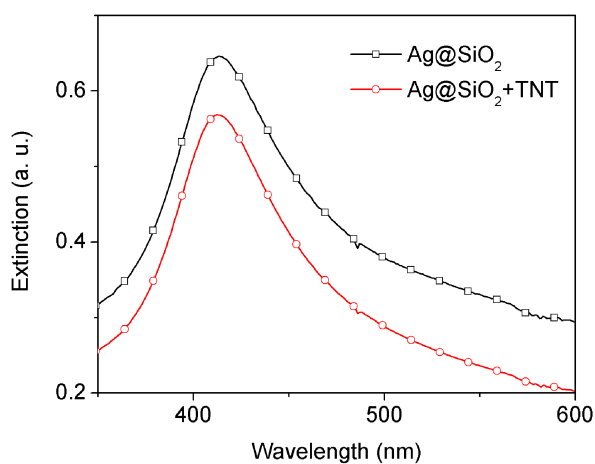

Figure S4. Relative extinction changes ( $\Delta E/E_0$ ) of silica-embedded silver clusters at 410 nm versus TNT concentration.

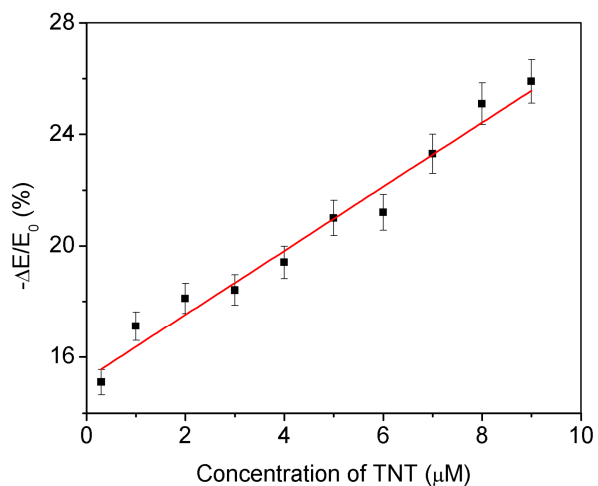

Figure S5. Absorption spectra of 100  $\mu\text{M}$  solution of phenol (a) and centrifugate of the mixture of 100  $\mu\text{M}$  solution of phenol and silica-embedded silver clusters (b).

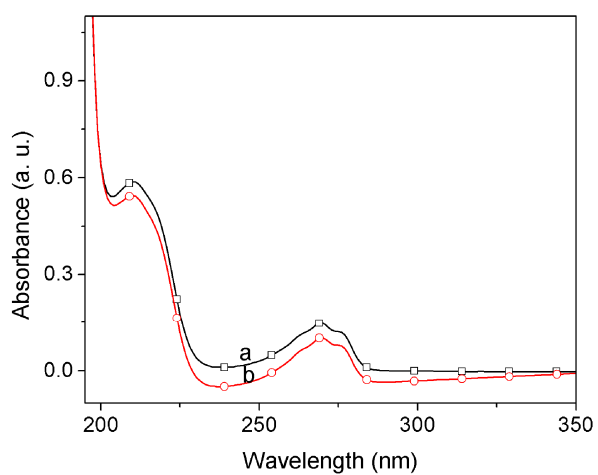

Figure S6. Absorption spectra of 100  $\mu\text{M}$  solution of sodium phenolate (a) and centrifugate of the mixture of 100  $\mu\text{M}$  solution of sodium phenolate and silica-embedded silver clusters (b).

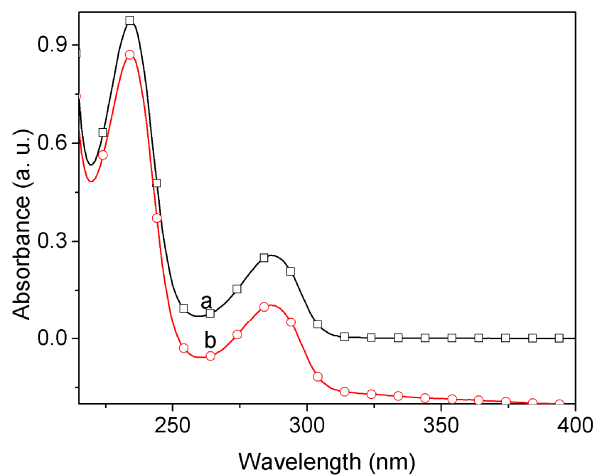

Figure S7. Absorption spectra of 100  $\mu\text{M}$  solution of TNT (a) and centrifugate of the mixture of 100  $\mu\text{M}$  solution of TNT and silica-embedded silver clusters (b).

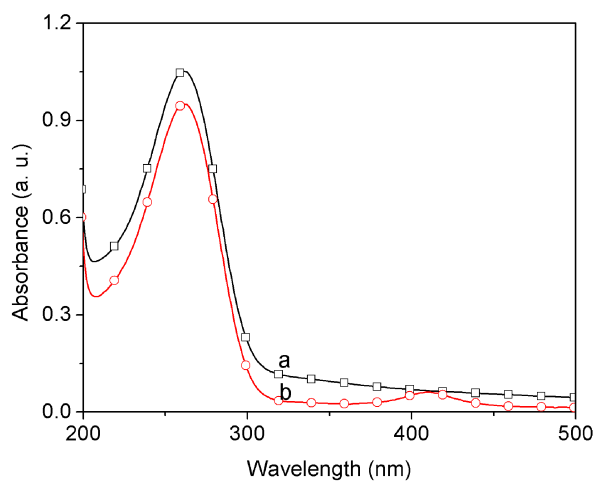

Supplement: c2jm31770b.pdf [file c2jm31770b.pdf]
